# Supplementary material for: Strong intermolecular interaction induced methylene-bridged asymmetric heterocyclic explosives
Source: Royal Society of Chemistry journal article supplement (doi:10.1039/d1ce01083b), 2021-01-01
Supplement: d1ce01083b1.pdf [file d1ce01083b1.pdf]

# Strong Intermolecular Interactions Induced Methylene-Bridged Asymmetric Heterocyclic Explosives

Yu Wang, Jin Ye, Na Yang, Haixia Ma\*, Yazhou Zhang, Zhaoqi Guo\*

<sup>1</sup>School of Chemical Engineering / Xi'an Key Laboratory of Special Energy Materials,  
Northwest University, Xi'an 710069, Shaanxi, P. R. China.

## Table of Contents

1. Hydrogen bonds for **4**, **5** and **6**. (Table S1–S3)
2. Bond lengths (Å) and angles (°) for **4**, **5** and **6**. (Table S4–S6)
3. Computational details. (Table S7–S9)
4. General methods.
5. References.

**Table S1–3.** Hydrogen bonds present for **4**, **5** and **6****Table S1.** Hydrogen bonds present in **4**

| D–H···A | d(D–H)/Å | d(H–A)/Å | d(D–A)/Å | D–H–A/° |
|---------|----------|----------|----------|---------|
| N1–H1   | 0.847    | 2.559    | 3.019    | 115.27  |
| N1–H1   | 0.847    | 2.096    | 2.561    | 114.08  |
| N1–H1   | 0.847    | 2.629    | 3.451    | 163.75  |
| N6–H6   | 0.879    | 2.031    | 2.857    | 156.27  |
| C2–H2A  | 0.990    | 2.444    | 3.012    | 115.95  |
| C2–H2A  | 0.990    | 2.546    | 3.387    | 142.81  |
| C2–H2B  | 0.990    | 2.479    | 3.181    | 127.56  |
| C2–H2B  | 0.990    | 2.393    | 3.083    | 126.22  |

Symmetry codes: (i)  $x+1/2, -y+3/2, -z+1$ ; (ii)  $x+1/2, -y+3/2, -z+1$ ; (iii)  $-x+1/2, y+1/2, z$ ; (iv)  $x-1/2, -y+3/2, -z+1$ ; (v)  $-x+3/2, y+1/2, z$ ; (vi)  $x+1/2, y, -z+3/2$ ; (vii)  $-x+1/2, y+1/2, z$ .

**Table S2.** Hydrogen bonds present in **5**

| D–H···A  | d(D–H)/Å | d(H–A)/Å | d(D–A)/Å | D–H–A/° |
|----------|----------|----------|----------|---------|
| C3–H3B   | 0.968    | 2.500    | 3.422    | 159.22  |
| N11–H11A | 0.933    | 1.944    | 2.872    | 173.15  |
| N11–H11B | 0.931    | 2.073    | 2.900    | 147.12  |
| N11–H11B | 0.931    | 2.664    | 3.232    | 119.98  |
| N11–H11B | 0.931    | 2.596    | 3.318    | 134.70  |
| N11–H11C | 0.934    | 2.158    | 3.091    | 176.88  |
| N11–H11D | 0.860    | 2.496    | 2.999    | 118.13  |
| N11–H11D | 0.860    | 2.436    | 3.175    | 144.42  |
| N12–H12A | 0.905    | 2.040    | 2.940    | 172.90  |
| N12–H12A | 0.905    | 2.634    | 3.211    | 122.38  |
| N12–H12A | 0.905    | 2.678    | 3.481    | 148.43  |
| N12–H12B | 0.924    | 1.971    | 2.827    | 153.25  |
| N12–H12C | 0.842    | 2.300    | 2.855    | 123.83  |
| N12–H12C | 0.842    | 2.217    | 2.956    | 146.59  |
| N12–H12D | 0.924    | 2.626    | 3.205    | 121.27  |
| N12–H12D | 0.924    | 2.115    | 2.972    | 153.75  |

**Table S3.** Hydrogen bonds present in **6**

| D–H···A | d(D–H)/Å | d(H–A)/Å | d(D–A)/Å | D–H–A/° |
|---------|----------|----------|----------|---------|
| C2–H2A  | 0.990    | 2.551    | 3.506    | 162.04  |
| C2–H2B  | 0.990    | 2.699    | 3.675    | 168.56  |

**Table S4–6.** Selected bond lengths (Å) and angles (°) for **4**, **5** and **6****Table S4.** Selected bond lengths (Å) and angles (°) for **4**

| Compound <b>4</b> |          |  |      |          |
|-------------------|----------|--|------|----------|
| O3N10             | 1.234(3) |  | N4N3 | 1.364(3) |

|         |          |        |          |
|---------|----------|--------|----------|
| O2N10   | 1.233(3) | N4C1   | 1.351(4) |
| O4N8    | 1.233(3) | N4C2   | 1.451(4) |
| O5N8    | 1.244(3) | N3N2   | 1.276(3) |
| O1N5    | 1.432(3) | N2N1   | 1.365(3) |
| O1C4    | 1.337(3) | N1C1   | 1.349(4) |
| N8N7    | 1.362(3) | N6C3   | 1.372(4) |
| N7C1    | 1.334(4) | N6C4   | 1.335(3) |
| N9N10   | 1.360(3) | N5C3   | 1.285(3) |
| N9C4    | 1.317(4) | C3C2   | 1.486(4) |
| C4O1N5  | 108.2(2) | C1N1N2 | 110.6(2) |
| O4N8O5  | 123.2(2) | C4N6C3 | 106.1(2) |
| O4N8N7  | 114.8(2) | C3N5O1 | 104.1(2) |
| O5N8N7  | 121.9(2) | N6C3C2 | 122.7(2) |
| C1N7N8  | 114.0(2) | N5C3N6 | 112.8(2) |
| C4N9N10 | 116.1(2) | N5C3C2 | 124.5(3) |
| O3N10N9 | 122.3(2) | N9C4O1 | 115.0(2) |
| O2N10O3 | 123.6(2) | N9C4N6 | 136.4(3) |
| O2N10N9 | 114.1(2) | N6C4O1 | 108.7(2) |
| N3N4C2  | 121.0(2) | N7C1N4 | 120.4(3) |
| C1N4N3  | 110.9(2) | N7C1N1 | 136.7(3) |
| C1N4C2  | 127.8(2) | N1C1N4 | 102.9(2) |
| N2N3N4  | 107.6(2) | N4C2C3 | 110.8(2) |
| N3N2N1  | 108.0(2) |        |          |

**Table S5.** Selected bond lengths (Å) and angles (°) for **5**

| <b>Compound 5</b> |            |         |            |
|-------------------|------------|---------|------------|
| O4N10             | 1.275(2)   | N5C4    | 1.353(2)   |
| O5N10             | 1.242(2)   | N5C3    | 1.457(2)   |
| O3N1              | 1.255(2)   | N9C4    | 1.372(2)   |
| O2N1              | 1.251(2)   | N8C4    | 1.332(2)   |
| O1N4              | 1.423(2)   | C2C3    | 1.500(3)   |
| O1C1              | 1.356(2)   | C3H3A   | 0.99(2)    |
| N10N9             | 1.322(2)   | C3H3B   | 0.97(2)    |
| N3C1              | 1.313(3)   | N11H11A | 0.93(3)    |
| N3C2              | 1.378(2)   | N11H11B | 0.93(3)    |
| N6N7              | 1.295(2)   | N11H11C | 0.93(3)    |
| N6N5              | 1.352(2)   | N11H11D | 0.86(3)    |
| N4C2              | 1.297(3)   | N12H12A | 0.91(3)    |
| N7N8              | 1.364(2)   | N12H12B | 0.92(3)    |
| N1N2              | 1.330(2)   | N12H12C | 0.84(3)    |
| N2C1              | 1.354(3)   | N12H12D | 0.924(19)  |
| C1O1N4            | 106.42(15) | N2C1O1  | 110.15(17) |
| O4N10N9           | 115.23(15) | N3C2C3  | 120.93(18) |
| O5N10O4           | 119.46(15) | N4C2N3  | 116.34(18) |

|         |            |             |            |
|---------|------------|-------------|------------|
| O5N10N9 | 125.27(16) | N4C2C3      | 122.72(18) |
| C1N3C2  | 101.81(17) | N5C3C2      | 111.23(17) |
| N7N6N5  | 106.51(15) | N5C3H3A     | 110.5(12)  |
| C2N4O1  | 102.59(15) | N5C3H3B     | 108.3(12)  |
| N6N7N8  | 110.96(15) | C2C3H3A     | 108.6(12)  |
| O3N1N2  | 123.31(16) | C2C3H3B     | 110.2(12)  |
| O2N1O3  | 120.56(17) | H3AC3H3B    | 107.9(18)  |
| O2N1N2  | 116.12(17) | H11AN11H11B | 111.(2)    |
| N1N2C1  | 117.54(17) | H11AN11H11C | 108.(2)    |
| N6N5C4  | 108.74(15) | H11AN11H11D | 110.(2)    |
| N6N5C3  | 121.22(16) | H11BN11H11C | 107.(2)    |
| C4N5C3  | 130.01(17) | H11BN11H11D | 110.(2)    |
| N10N9C4 | 115.08(15) | H11CN11H11D | 111.(2)    |
| C4N8N7  | 106.12(16) | H12AN12H12B | 117.(3)    |
| N5C4N9  | 118.19(17) | H12AN12H12C | 113.(3)    |
| N8C4N5  | 107.66(16) | H12AN12H12D | 106.(3)    |
| N8C4N9  | 134.14(18) | H12BN12H12C | 111.(3)    |
| N3C1O1  | 112.83(17) | H12BN12H12D | 97.(3)     |
| N3C1N2  | 136.95(19) | H12CN12H12D | 112.(3)    |

**Table S6.** Selected bond lengths (Å) and angles (°) for **6**

| <b>Complex 6</b>     |            |                      |          |
|----------------------|------------|----------------------|----------|
| K1O4 <sup>ii</sup>   | 2.718(2)   | K2C4 <sup>viii</sup> | 3.405(3) |
| K1O4 <sup>iii</sup>  | 2.7564(19) | O4N8                 | 1.271(3) |
| K1O5                 | 2.5964(19) | O5N8                 | 1.247(3) |
| K1O5 <sup>iii</sup>  | 2.8798(19) | O1N5                 | 1.426(3) |
| K1O2 <sup>iv</sup>   | 2.7880(19) | O1C4                 | 1.355(3) |
| K1N8 <sup>iii</sup>  | 3.181(2)   | O3N10                | 1.253(3) |
| K1N8 <sup>ii</sup>   | 3.256(2)   | O2N10                | 1.257(3) |
| K1N7 <sup>ii</sup>   | 3.249(2)   | N8N7                 | 1.308(3) |
| K1N1                 | 2.791(2)   | N7C1                 | 1.368(3) |
| K1N3 <sup>v</sup>    | 3.120(2)   | N4N3                 | 1.355(3) |
| K1N2 <sup>vi</sup>   | 3.073(2)   | N4C1                 | 1.353(3) |
| K2O4 <sup>vii</sup>  | 2.7468(19) | N4C2                 | 1.450(3) |
| K2O1 <sup>viii</sup> | 2.968(2)   | N1N2                 | 1.366(3) |
| K2O3 <sup>ix</sup>   | 2.848(2)   | N1C1                 | 1.334(3) |
| K2O3                 | 2.690(2)   | N9N10                | 1.322(3) |
| K2O2 <sup>ix</sup>   | 2.922(2)   | N9C4                 | 1.363(3) |
| K2N7 <sup>vii</sup>  | 3.425(2)   | N3N2                 | 1.293(3) |
| K2N9 <sup>viii</sup> | 2.972(2)   | N6C4                 | 1.315(3) |
| K2N3 <sup>x</sup>    | 3.135(2)   | N6C3                 | 1.368(3) |
| K2N6                 | 2.833(2)   | N5C3                 | 1.297(3) |
| K2N10 <sup>ix</sup>  | 3.280(2)   | C3C2                 | 1.507(4) |

|                                       |            |                                         |            |
|---------------------------------------|------------|-----------------------------------------|------------|
| K2N5 <sup>x</sup>                     | 3.110(2)   | C2H2A                                   | 0.9900     |
| N9 <sup>viii</sup> K2N5 <sup>x</sup>  | 154.95(6)  | C2H2B                                   | 0.9900     |
| O4 <sup>ii</sup> K1O4 <sup>iii</sup>  | 81.63(6)   | N9 <sup>viii</sup> K2N10 <sup>ix</sup>  | 103.80(6)  |
| O4 <sup>iii</sup> K1O5 <sup>iii</sup> | 45.25(5)   | N9 <sup>viii</sup> K2C4 <sup>viii</sup> | 23.45(6)   |
| O4 <sup>ii</sup> K1O5 <sup>iii</sup>  | 103.31(5)  | N3 <sup>x</sup> K2N7 <sup>vii</sup>     | 94.49(6)   |
| O4 <sup>ii</sup> K1O2 <sup>iv</sup>   | 87.62(6)   | N3 <sup>x</sup> K2N10 <sup>ix</sup>     | 98.23(6)   |
| O4 <sup>iii</sup> K1O2 <sup>iv</sup>  | 168.88(6)  | N3 <sup>x</sup> K2C4 <sup>viii</sup>    | 165.54(6)  |
| O4 <sup>iii</sup> K1N8 <sup>iii</sup> | 23.34(5)   | N6K2O1 <sup>viii</sup>                  | 102.15(6)  |
| O4 <sup>ii</sup> K1N8 <sup>iii</sup>  | 88.08(6)   | N6K2O3 <sup>ix</sup>                    | 135.63(6)  |
| O4 <sup>ii</sup> K1N8 <sup>ii</sup>   | 22.32(5)   | N6K2O2 <sup>ix</sup>                    | 175.75(6)  |
| O4 <sup>iii</sup> K1N8 <sup>ii</sup>  | 85.92(6)   | N6K2N7 <sup>vii</sup>                   | 114.89(6)  |
| O4 <sup>iii</sup> K1N7 <sup>ii</sup>  | 105.64(6)  | N6K2N9 <sup>viii</sup>                  | 76.92(6)   |
| O4 <sup>ii</sup> K1N7 <sup>ii</sup>   | 41.67(5)   | N6K2N3 <sup>x</sup>                     | 94.41(6)   |
| O4 <sup>ii</sup> K1N1                 | 154.78(6)  | N6K2N10 <sup>ix</sup>                   | 156.66(6)  |
| O4 <sup>iii</sup> K1N1                | 113.49(6)  | N6K2N5 <sup>x</sup>                     | 87.95(6)   |
| O4 <sup>ii</sup> K1N3 <sup>v</sup>    | 60.67(5)   | N6K2C4 <sup>viii</sup>                  | 83.02(6)   |
| O4 <sup>iii</sup> K1N3 <sup>v</sup>   | 79.77(6)   | N10 <sup>ix</sup> K2N7 <sup>vii</sup>   | 83.67(5)   |
| O4 <sup>ii</sup> K1N2 <sup>vi</sup>   | 77.88(6)   | N10 <sup>ix</sup> K2C4 <sup>viii</sup>  | 89.26(6)   |
| O4 <sup>iii</sup> K1N2 <sup>vi</sup>  | 58.75(6)   | N5 <sup>x</sup> K2N7 <sup>vii</sup>     | 146.41(6)  |
| N10O3K2                               | 140.56(16) | N5 <sup>x</sup> K2N3 <sup>x</sup>       | 57.75(6)   |
| O5K1O4 <sup>ii</sup>                  | 133.49(6)  | N5 <sup>x</sup> K2N10 <sup>ix</sup>     | 82.38(6)   |
| O5K1O4 <sup>iii</sup>                 | 117.30(6)  | N5 <sup>x</sup> K2C4 <sup>viii</sup>    | 136.02(6)  |
| O5K1O5 <sup>iii</sup>                 | 120.31(3)  | C4 <sup>viii</sup> K2N7 <sup>vii</sup>  | 73.95(6)   |
| O5K1O2 <sup>iv</sup>                  | 72.45(6)   | K1 <sup>vii</sup> O4K1 <sup>vi</sup>    | 98.37(6)   |
| O5K1N8 <sup>ii</sup>                  | 112.23(6)  | K1 <sup>vii</sup> O4K2 <sup>ii</sup>    | 89.04(6)   |
| O5 <sup>iii</sup> K1N8 <sup>ii</sup>  | 119.66(5)  | K2 <sup>ii</sup> O4K1 <sup>vi</sup>     | 146.77(7)  |
| O5 <sup>iii</sup> K1N8 <sup>iii</sup> | 23.06(5)   | N8O4K1 <sup>vii</sup>                   | 103.40(14) |
| O5K1N8 <sup>iii</sup>                 | 126.75(6)  | N8O4K1 <sup>vi</sup>                    | 97.41(14)  |
| O5K1N7 <sup>ii</sup>                  | 91.94(6)   | N8O4K2 <sup>ii</sup>                    | 112.37(14) |
| O5 <sup>iii</sup> K1N7 <sup>ii</sup>  | 142.86(5)  | K1O5K1 <sup>vi</sup>                    | 125.65(7)  |
| O5K1N1                                | 59.12(6)   | N8O5K1                                  | 135.22(15) |
| O5K1N3 <sup>v</sup>                   | 156.90(6)  | N8O5K1 <sup>vi</sup>                    | 92.15(13)  |
| O5 <sup>iii</sup> K1N3 <sup>v</sup>   | 59.44(6)   | N5O1K2 <sup>xi</sup>                    | 135.24(14) |
| O5 <sup>iii</sup> K1N2 <sup>vi</sup>  | 102.03(6)  | C4O1K2 <sup>xi</sup>                    | 96.75(14)  |
| O5K1N2 <sup>vi</sup>                  | 78.04(6)   | C4O1N5                                  | 106.21(19) |
| O2 <sup>iv</sup> K1O5 <sup>iii</sup>  | 136.24(6)  | K2O3K2 <sup>ix</sup>                    | 100.47(6)  |
| O2 <sup>iv</sup> K1N8 <sup>iii</sup>  | 154.24(6)  | N10O3K2 <sup>ix</sup>                   | 98.69(15)  |
| O2 <sup>iv</sup> K1N8 <sup>ii</sup>   | 85.20(6)   | K1 <sup>iv</sup> O2K2 <sup>ix</sup>     | 84.25(5)   |
| O2 <sup>iv</sup> K1N7 <sup>ii</sup>   | 67.34(6)   | N10O2K1 <sup>iv</sup>                   | 145.40(16) |
| O2 <sup>iv</sup> K1N1                 | 75.63(6)   | N10O2K2 <sup>ix</sup>                   | 95.01(15)  |
| O2 <sup>iv</sup> K1N3 <sup>v</sup>    | 92.50(6)   | K1 <sup>vi</sup> N8K1 <sup>vii</sup>    | 80.12(5)   |
| O2 <sup>iv</sup> K1N2 <sup>vi</sup>   | 121.73(6)  | K1 <sup>vii</sup> N8K2 <sup>ii</sup>    | 69.77(4)   |
| O4N8K2 <sup>ii</sup>                  | 47.64(11)  | K1 <sup>vi</sup> N8K2 <sup>ii</sup>     | 105.58(6)  |
| N8 <sup>iii</sup> K1N8 <sup>ii</sup>  | 99.88(5)   | O4N8K1 <sup>vi</sup>                    | 59.24(12)  |

|                                         |           |                                      |            |
|-----------------------------------------|-----------|--------------------------------------|------------|
| N8 <sup>iii</sup> K1N7 <sup>ii</sup>    | 122.42(6) | O4N8K1 <sup>vii</sup>                | 54.29(12)  |
| O5N8O4                                  | 119.1(2)  | O4N8N7                               | 115.4(2)   |
| N7 <sup>ii</sup> K1N8 <sup>ii</sup>     | 23.20(5)  | O5N8K1 <sup>vii</sup>                | 134.85(15) |
| N1K1O5 <sup>iii</sup>                   | 77.68(6)  | O5N8K1 <sup>vi</sup>                 | 64.79(12)  |
| N1K1N8 <sup>ii</sup>                    | 160.57(6) | O5N8K2 <sup>ii</sup>                 | 144.63(16) |
| N1K1N8 <sup>iii</sup>                   | 98.80(6)  | O5N8N7                               | 125.5(2)   |
| N1K1N7 <sup>ii</sup>                    | 138.77(6) | N7N8K1 <sup>vii</sup>                | 78.11(13)  |
| N1K1N3 <sup>v</sup>                     | 100.77(6) | N7N8K1 <sup>vi</sup>                 | 154.81(16) |
| N1K1N2 <sup>vi</sup>                    | 126.97(7) | N7N8K2 <sup>ii</sup>                 | 78.49(13)  |
| N3N4C2                                  | 122.0(2)  | K1 <sup>vii</sup> N7K2 <sup>ii</sup> | 70.01(4)   |
| N3 <sup>v</sup> K1N8 <sup>ii</sup>      | 82.97(6)  | N8N7K1 <sup>vii</sup>                | 78.70(13)  |
| N3 <sup>v</sup> K1N8 <sup>iii</sup>     | 63.45(6)  | N8N7K2 <sup>ii</sup>                 | 79.55(13)  |
| N3 <sup>v</sup> K1N7 <sup>ii</sup>      | 98.38(6)  | N8N7C1                               | 116.2(2)   |
| N2 <sup>vi</sup> K1N8 <sup>iii</sup>    | 82.00(6)  | C1N7K1 <sup>vii</sup>                | 142.47(17) |
| N2 <sup>vi</sup> K1N8 <sup>ii</sup>     | 61.41(6)  | C1N7K2 <sup>ii</sup>                 | 143.47(17) |
| N2 <sup>vi</sup> K1N7 <sup>ii</sup>     | 64.70(6)  | C1N4N3                               | 108.9(2)   |
| N2 <sup>vi</sup> K1N3 <sup>v</sup>      | 125.06(6) | C1N4C2                               | 129.1(2)   |
| O4 <sup>vii</sup> K2O1 <sup>viii</sup>  | 116.13(5) | N2N1K1                               | 125.69(16) |
| O4 <sup>vii</sup> K2O3 <sup>ix</sup>    | 127.02(6) | C1N1K1                               | 125.00(16) |
| O4 <sup>vii</sup> K2O2 <sup>ix</sup>    | 84.45(6)  | C1N1N2                               | 105.6(2)   |
| O4 <sup>vii</sup> K2N7 <sup>vii</sup>   | 39.46(5)  | N10N9K2 <sup>xi</sup>                | 138.69(17) |
| O4 <sup>vii</sup> K2N9 <sup>viii</sup>  | 83.97(6)  | N10N9C4                              | 117.0(2)   |
| O4 <sup>vii</sup> K2N3 <sup>x</sup>     | 60.20(6)  | C4N9K2 <sup>xi</sup>                 | 96.37(15)  |
| O4 <sup>vii</sup> K2N6                  | 96.59(6)  | K1 <sup>x</sup> N3K2 <sup>v</sup>    | 75.54(5)   |
| O4 <sup>vii</sup> K2N10 <sup>ix</sup>   | 106.72(6) | N4N3K1 <sup>x</sup>                  | 128.17(15) |
| O4 <sup>vii</sup> K2N5 <sup>x</sup>     | 117.95(6) | N4N3K2 <sup>v</sup>                  | 126.63(15) |
| O4 <sup>vii</sup> K2C4 <sup>viii</sup>  | 105.84(6) | N2N3K1 <sup>x</sup>                  | 111.09(15) |
| O1 <sup>viii</sup> K2N7 <sup>vii</sup>  | 77.77(5)  | N2N3K2 <sup>v</sup>                  | 105.91(15) |
| O1 <sup>viii</sup> K2N9 <sup>viii</sup> | 44.01(6)  | N2N3N4                               | 106.0(2)   |
| O1 <sup>viii</sup> K2N3 <sup>x</sup>    | 163.41(6) | N1N2K1 <sup>iii</sup>                | 114.64(15) |
| O1 <sup>viii</sup> K2N10 <sup>ix</sup>  | 66.59(5)  | N3N2K1 <sup>iii</sup>                | 123.85(16) |
| O1 <sup>viii</sup> K2N5 <sup>x</sup>    | 123.16(6) | N3N2N1                               | 111.7(2)   |
| O1 <sup>viii</sup> K2C4 <sup>viii</sup> | 23.28(6)  | C4N6K2                               | 128.33(17) |
| O3K2O4 <sup>vii</sup>                   | 152.45(6) | C4N6C3                               | 101.4(2)   |
| O3 <sup>ix</sup> K2O1 <sup>viii</sup>   | 68.42(6)  | C3N6K2                               | 129.74(17) |
| O3K2O1 <sup>viii</sup>                  | 62.74(6)  | O3N10K2 <sup>ix</sup>                | 59.14(13)  |
| O3K2O3 <sup>ix</sup>                    | 79.53(6)  | O3N10O2                              | 120.1(2)   |
| O3 <sup>ix</sup> K2O2 <sup>ix</sup>     | 44.25(5)  | O3N10N9                              | 124.1(2)   |
| O3K2O2 <sup>ix</sup>                    | 118.84(6) | O2N10K2 <sup>ix</sup>                | 62.54(13)  |
| O3 <sup>ix</sup> K2N7 <sup>vii</sup>    | 105.47(5) | O2N10N9                              | 115.8(2)   |
| O3K2N7 <sup>vii</sup>                   | 135.40(6) | N9N10K2 <sup>ix</sup>                | 168.47(17) |
| O3K2N9 <sup>viii</sup>                  | 78.19(6)  | O1N5K2 <sup>v</sup>                  | 101.10(13) |
| O3 <sup>ix</sup> K2N9 <sup>viii</sup>   | 111.73(6) | C3N5K2 <sup>v</sup>                  | 122.49(17) |
| O3 <sup>ix</sup> K2N3 <sup>x</sup>      | 100.23(6) | C3N5O1                               | 102.11(19) |

|                                         |           |                                   |            |
|-----------------------------------------|-----------|-----------------------------------|------------|
| O3K2N3 <sup>x</sup>                     | 128.85(6) | N4C1N7                            | 117.5(2)   |
| O3K2N6                                  | 59.11(6)  | N1C1N7                            | 134.7(2)   |
| O3K2N10 <sup>ix</sup>                   | 97.88(6)  | N1C1N4                            | 107.8(2)   |
| O3 <sup>ix</sup> K2N10 <sup>ix</sup>    | 22.18(5)  | O1C4K2 <sup>xi</sup>              | 59.97(12)  |
| O3K2N5 <sup>x</sup>                     | 76.91(6)  | O1C4N9                            | 109.9(2)   |
| O3 <sup>ix</sup> K2N5 <sup>x</sup>      | 66.16(6)  | N9C4K2 <sup>xi</sup>              | 60.18(13)  |
| O3 <sup>ix</sup> K2C4 <sup>viii</sup>   | 91.38(6)  | N6C4K2 <sup>xi</sup>              | 145.59(18) |
| O3K2C4 <sup>viii</sup>                  | 61.54(6)  | N6C4O1                            | 113.1(2)   |
| O2 <sup>ix</sup> K2O1 <sup>viii</sup>   | 73.74(6)  | N6C4N9                            | 136.9(2)   |
| O2 <sup>ix</sup> K2N7 <sup>vii</sup>    | 63.53(5)  | N6C3C2                            | 120.1(2)   |
| O2 <sup>ix</sup> K2N9 <sup>viii</sup>   | 99.12(6)  | N5C3N6                            | 117.2(2)   |
| O2 <sup>ix</sup> K2N3 <sup>x</sup>      | 89.69(6)  | N5C3C2                            | 122.7(2)   |
| O2 <sup>ix</sup> K2N10 <sup>ix</sup>    | 22.44(5)  | N4C2C3                            | 111.7(2)   |
| O2 <sup>ix</sup> K2N5 <sup>x</sup>      | 95.22(6)  | N4C2H2A                           | 109.300    |
| O2 <sup>ix</sup> K2C4 <sup>viii</sup>   | 92.72(6)  | N4C2H2B                           | 109.300    |
| N9 <sup>viii</sup> K2N7 <sup>vii</sup>  | 58.51(6)  | C3C2H2A                           | 109.300    |
| N3 <sup>v</sup> K1N8 <sup>iii</sup>     | 63.45(6)  | C3C2H2B                           | 109.300    |
| N3 <sup>v</sup> K1N7 <sup>ii</sup>      | 98.38(6)  | H2AC2H2B                          | 107.900    |
| N2 <sup>vi</sup> K1N8 <sup>iii</sup>    | 82.00(6)  | C1N7K1 <sup>vii</sup>             | 142.47(17) |
| N2 <sup>vi</sup> K1N8 <sup>ii</sup>     | 61.41(6)  | C1N7K2 <sup>ii</sup>              | 143.47(17) |
| N2 <sup>vi</sup> K1N7 <sup>ii</sup>     | 64.70(6)  | N3N4C2                            | 122.0(2)   |
| N2 <sup>vi</sup> K1N3 <sup>v</sup>      | 125.06(6) | C1N4N3                            | 108.9(2)   |
| O4 <sup>vii</sup> K2O1 <sup>viii</sup>  | 116.13(5) | C1N4C2                            | 129.1(2)   |
| O4 <sup>vii</sup> K2O3 <sup>ix</sup>    | 127.02(6) | N2N1K1                            | 125.69(16) |
| O4 <sup>vii</sup> K2O2 <sup>ix</sup>    | 84.45(6)  | C1N1K1                            | 125.00(16) |
| O4 <sup>vii</sup> K2N7 <sup>vii</sup>   | 39.46(5)  | C1N1N2                            | 105.6(2)   |
| O4 <sup>vii</sup> K2N9 <sup>viii</sup>  | 83.97(6)  | N10N9K2 <sup>xi</sup>             | 138.69(17) |
| O4 <sup>vii</sup> K2N3 <sup>x</sup>     | 60.20(6)  | N10N9C4                           | 117.0(2)   |
| O4 <sup>vii</sup> K2N6                  | 96.59(6)  | C4N9K2 <sup>xi</sup>              | 96.37(15)  |
| O4 <sup>vii</sup> K2N10 <sup>ix</sup>   | 106.72(6) | K1 <sup>x</sup> N3K2 <sup>v</sup> | 75.54(5)   |
| O4 <sup>vii</sup> K2N5 <sup>x</sup>     | 117.95(6) | N4N3K1 <sup>x</sup>               | 128.17(15) |
| O4 <sup>vii</sup> K2C4 <sup>viii</sup>  | 105.84(6) | N4N3K2 <sup>v</sup>               | 126.63(15) |
| O1 <sup>viii</sup> K2N7 <sup>vii</sup>  | 77.77(5)  | N2N3K1 <sup>x</sup>               | 111.09(15) |
| O1 <sup>viii</sup> K2N9 <sup>viii</sup> | 44.01(6)  | N2N3K2 <sup>v</sup>               | 105.91(15) |
| O1 <sup>viii</sup> K2N3 <sup>x</sup>    | 163.41(6) | N2N3N4                            | 106.0(2)   |
| O1 <sup>viii</sup> K2N10 <sup>ix</sup>  | 66.59(5)  | N1N2K1 <sup>iii</sup>             | 114.64(15) |
| O1 <sup>viii</sup> K2N5 <sup>x</sup>    | 123.16(6) | N3N2K1 <sup>iii</sup>             | 123.85(16) |
| O1 <sup>viii</sup> K2C4 <sup>viii</sup> | 23.28(6)  | N3N2N1                            | 111.7(2)   |
| O3K2O4 <sup>vii</sup>                   | 152.45(6) | C4N6K2                            | 128.33(17) |
| O3 <sup>ix</sup> K2O1 <sup>viii</sup>   | 68.42(6)  | C4N6C3                            | 101.4(2)   |
| O3K2O1 <sup>viii</sup>                  | 62.74(6)  | C3N6K2                            | 129.74(17) |
| O3K2O3 <sup>ix</sup>                    | 79.53(6)  | O3N10K2 <sup>ix</sup>             | 59.14(13)  |
| O3 <sup>ix</sup> K2O2 <sup>ix</sup>     | 44.25(5)  | O3N10O2                           | 120.1(2)   |
| O3K2O2 <sup>ix</sup>                    | 118.84(6) | O3N10N9                           | 124.1(2)   |

|                                        |           |                       |            |
|----------------------------------------|-----------|-----------------------|------------|
| O3 <sup>ix</sup> K2N7 <sup>vii</sup>   | 105.47(5) | O2N10K2 <sup>ix</sup> | 62.54(13)  |
| O3K2N7 <sup>vii</sup>                  | 135.40(6) | O2N10N9               | 115.8(2)   |
| O3K2N9 <sup>viii</sup>                 | 78.19(6)  | N9N10K2 <sup>ix</sup> | 168.47(17) |
| O3 <sup>ix</sup> K2N9 <sup>viii</sup>  | 111.73(6) | O1N5K2 <sup>v</sup>   | 101.10(13) |
| O3 <sup>ix</sup> K2N3 <sup>x</sup>     | 100.23(6) | C3N5K2 <sup>v</sup>   | 122.49(17) |
| O3K2N3 <sup>x</sup>                    | 128.85(6) | C3N5O1                | 102.11(19) |
| O3K2N6                                 | 59.11(6)  | N4C1N7                | 117.5(2)   |
| O3K2N10 <sup>ix</sup>                  | 97.88(6)  | N1C1N7                | 134.7(2)   |
| O3 <sup>ix</sup> K2N10 <sup>ix</sup>   | 22.18(5)  | N1C1N4                | 107.8(2)   |
| O3K2N5 <sup>x</sup>                    | 76.91(6)  | O1C4K2 <sup>xi</sup>  | 59.97(12)  |
| O3 <sup>ix</sup> K2N5 <sup>x</sup>     | 66.16(6)  | O1C4N9                | 109.9(2)   |
| O3 <sup>ix</sup> K2C4 <sup>viii</sup>  | 91.38(6)  | N9C4K2 <sup>xi</sup>  | 60.18(13)  |
| O3K2C4 <sup>viii</sup>                 | 61.54(6)  | N6C4K2 <sup>xi</sup>  | 145.59(18) |
| O2 <sup>ix</sup> K2O1 <sup>viii</sup>  | 73.74(6)  | N6C4O1                | 113.1(2)   |
| O2 <sup>ix</sup> K2N7 <sup>vii</sup>   | 63.53(5)  | N6C4N9                | 136.9(2)   |
| O2 <sup>ix</sup> K2N9 <sup>viii</sup>  | 99.12(6)  | N6C3C2                | 120.1(2)   |
| O2 <sup>ix</sup> K2N3 <sup>x</sup>     | 89.69(6)  | N5C3N6                | 117.2(2)   |
| O2 <sup>ix</sup> K2N10 <sup>ix</sup>   | 22.44(5)  | N5C3C2                | 122.7(2)   |
| O2 <sup>ix</sup> K2N5 <sup>x</sup>     | 95.22(6)  | N4C2C3                | 111.7(2)   |
| O2 <sup>ix</sup> K2C4 <sup>viii</sup>  | 92.72(6)  | N4C2H2A               | 109.300    |
| N9 <sup>viii</sup> K2N7 <sup>vii</sup> | 58.51(6)  | N4C2H2B               | 109.300    |
| N9 <sup>viii</sup> K2N3 <sup>x</sup>   | 142.17(6) | C3C2H2A               | 109.300    |
| H2AC2H2B                               | 107.900   | C3C2H2B               | 109.300    |

(i) x, y, -1+z; (ii) x, 1.5-y, -0.5+z; (iii) 2-x, -0.5+y, 0.5-z; (iv) 1-x, 1-y, 1-z; (v) x, 0.5-y, -0.5+z; (vi) 2-x, 0.5+y, 0.5-z; (vii) x, 1.5-y, 0.5+z; (viii) 1-x, 0.5+y, 1.5-z; (ix) 1-x, 1-y, 2-z; (x) x, 0.5-y, 0.5+z; (xi) 1-x, -0.5+y, 1.5-z.

**Table S7.** Composition of detonation products of compound 4

| Products                       | mol/mol  | mol/kg       | Mol %   |
|--------------------------------|----------|--------------|---------|
| N <sub>2</sub>                 | 4.97E+00 | 1. 826724E01 | 49.7377 |
| C(d)                           | 1.61E+00 | 5.92E+00     | 16.1292 |
| H <sub>2</sub> O               | 9.73E-01 | 3.57E+00     | 9.7330  |
| CH <sub>2</sub> O <sub>2</sub> | 9.43E-01 | 3.47E+00     | 9.4391  |
| CO <sub>2</sub>                | 7.19E-01 | 2.64E+00     | 7.1904  |
| CO                             | 7.03E-01 | 2.58E+00     | 7.0297  |
| NH <sub>3</sub>                | 1.15E-02 | 2.93E-02     | 0.101   |
| H <sub>2</sub>                 | 1.03E-02 | 2.61E-02     | 0.0901  |
| CH <sub>4</sub>                | 2.08E-03 | 5.29E-03     | 0.0182  |
| HCN                            | 1.89E-03 | 4.79E-03     | 0.0165  |
| C <sub>2</sub> H <sub>6</sub>  | 9.78E-05 | 2.48E-04     | 0.0009  |
| C <sub>2</sub> H <sub>4</sub>  | 8.79E-05 | 2.23E-04     | 0.0008  |
| CH <sub>3</sub> OH             | 2.83E-05 | 7.17E-05     | 0.0002  |
| NO                             | 5.75E-06 | 1.46E-05     | 0.0001  |
| N <sub>2</sub> H <sub>4</sub>  | 3.41E-06 | 8.66E-06     | 0       |



|                   |          |          |   |
|-------------------|----------|----------|---|
| H                 | 2.42E-06 | 6.13E-06 | 0 |
| NH <sub>2</sub>   | 2.34E-06 | 5.95E-06 | 0 |
| CH <sub>2</sub> O | 9.25E-07 | 2.35E-06 | 0 |
| OH                | 6.57E-07 | 1.67E-06 | 0 |
| CHNO              | 5.11E-07 | 1.30E-06 | 0 |
| CNO               | 5.11E-07 | 1.30E-06 | 0 |
| O <sub>2</sub>    | 2.02E-07 | 5.12E-07 | 0 |
| O                 | 1.02E-07 | 2.58E-07 | 0 |
| NO <sub>2</sub>   | 9.34E-09 | 2.37E-08 | 0 |
| N <sub>2</sub> O  | 8.36E-09 | 2.12E-08 | 0 |
| N                 | 7.47E-09 | 1.90E-08 | 0 |
| C(gr)             | 2.75E-10 | 6.98E-10 | 0 |

**Table S8.** Composition of detonation products of compound **5**

| Products                       | mol/mol  | mol/kg   | Mol %   |
|--------------------------------|----------|----------|---------|
| N <sub>2</sub>                 | 5.75E+00 | 1.88E+01 | 41.4956 |
| H <sub>2</sub> O               | 3.51E+00 | 1.15E+01 | 25.3420 |
| C(d)                           | 2.98E+00 | 9.75E+00 | 21.5208 |
| NH <sub>3</sub>                | 4.68E-01 | 1.53E+00 | 3.3735  |
| CH <sub>2</sub> O <sub>2</sub> | 4.52E-01 | 1.47E+00 | 3.2558  |
| CO                             | 3.07E-01 | 1.00E+00 | 2.2159  |
| H <sub>2</sub>                 | 1.49E-01 | 4.85E-01 | 1.0713  |
| CO <sub>2</sub>                | 1.37E-01 | 4.49E-01 | 0.9907  |
| H <sub>2</sub>                 | 1.43E-02 | 6.59E-02 | 0.1879  |
| CH <sub>4</sub>                | 7.62E-03 | 3.52E-02 | 0.1005  |
| HCN                            | 7.46E-04 | 3.45E-03 | 0.0098  |
| C <sub>2</sub> H <sub>6</sub>  | 5.48E-04 | 2.53E-03 | 0.0072  |
| C <sub>2</sub> H <sub>4</sub>  | 1.53E-04 | 7.06E-04 | 0.002   |
| CH <sub>3</sub> OH             | 4.86E-05 | 2.24E-04 | 0.0006  |
| N <sub>2</sub> H <sub>4</sub>  | 1.57E-06 | 7.25E-06 | 0       |
| CH <sub>2</sub> O              | 7.63E-07 | 3.53E-06 | 0       |
| NH <sub>2</sub>                | 7.15E-07 | 3.30E-06 | 0       |
| H                              | 6.67E-07 | 3.08E-06 | 0       |
| NO                             | 4.79E-07 | 2.21E-06 | 0       |
| CHNO                           | 2.30E-07 | 1.06E-06 | 0       |
| OH                             | 1.36E-07 | 6.28E-07 | 0       |
| CNO                            | 3.00E-08 | 1.39E-07 | 0       |
| O <sub>2</sub>                 | 8.46E-09 | 3.91E-08 | 0       |
| O                              | 3.88E-09 | 1.79E-08 | 0       |
| N <sub>2</sub> O               | 5.30E-10 | 2.45E-09 | 0       |
| C(gr)                          | 3.71E-10 | 1.71E-09 | 0       |
| N                              | 2.30E-10 | 1.06E-09 | 0       |
| NO <sub>2</sub>                | 2.24E-10 | 1.04E-09 | 0       |
| NO <sub>2</sub>                | 2.24E-10 | 1.04E-09 | 0       |

**Table S9.** Composition of detonation products of compound **6**

| Products                           | mol/mol  | mol/kg   | Mol %   |
|------------------------------------|----------|----------|---------|
| N <sub>2</sub>                     | 4.97E+00 | 1.43E+01 | 51.0947 |
| C(d)                               | 2.15E+00 | 6.18E+00 | 22.1037 |
| K <sub>2</sub> CO <sub>3</sub> (s) | 1.00E+00 | 2.87E+00 | 10.2718 |
| H <sub>2</sub> O                   | 7.02E-01 | 2.02E+00 | 7.2105  |
| CO                                 | 3.68E-01 | 1.06E+00 | 3.7814  |
| CO <sub>2</sub>                    | 2.58E-01 | 7.41E-01 | 2.6527  |
| CH <sub>2</sub> O <sub>2</sub>     | 2.07E-01 | 5.93E-01 | 2.1228  |
| NH <sub>3</sub>                    | 3.97E-02 | 1.14E-01 | 0.4074  |
| H <sub>2</sub>                     | 1.97E-02 | 5.70E-02 | 0.2040  |
| CH <sub>4</sub>                    | 1.51E-02 | 3.14E-02 | 0.0883  |
| C <sub>2</sub> H <sub>6</sub>      | 6.26E-03 | 1.30E-02 | 0.0366  |
| C <sub>2</sub> H <sub>4</sub>      | 7.57E-05 | 1.58E-04 | 0.0004  |
| CH <sub>3</sub> OH                 | 5.54E-05 | 1.15E-04 | 0.0003  |
| HCN                                | 5.21E-05 | 1.08E-04 | 0.0003  |
| N <sub>2</sub> H <sub>4</sub>      | 1.22E-06 | 2.54E-06 | 0       |
| OH                                 | 8.88E-07 | 1.85E-06 | 0       |
| CNO                                | 3.89E-07 | 8.11E-07 | 0       |
| O <sub>2</sub>                     | 2.44E-07 | 5.09E-07 | 0       |
| K                                  | 5.03E-08 | 1.46E-07 | 0       |
| C(gr)                              | 3.92E-10 | 1.13E-09 | 0       |
| KH                                 | 2.48E-12 | 7.11E-12 | 0       |
| K <sub>2</sub> CO <sub>3</sub>     | 4.88E-13 | 1.40E-12 | 0       |
| K <sub>2</sub> O(s)                | 2.68E-17 | 7.69E-17 | 0       |

#### 4. General methods.

All the reagents were obtained from commercial sources and used without further purification. Single-crystal X-ray diffractions were performed on a Bruker APEX-II CCD diffractometer with highly oriented graphite crystal monochromated MoK<sub>α</sub> radiation ( $\lambda = 0.071073$  nm). Semi-empirical absorption corrections were applied using SADABS program. The structures were solved by direct methods and refined by full-matrix least squares techniques based on  $F^2$ . All non-hydrogen atoms were refined anisotropically. Hydrogen atoms were added according to the theoretical models and refined isotropically. The CCDC numbers of **4**, **5** and **6** are 2062977, 2062976, and 2062975. TGA measurements were carried out on a METTLER TOLEDO TGA/DSC 3+ instrument with a heating rate of 10 °C·min<sup>-1</sup> under an argon atmosphere at a flow rate of 50 ml·min<sup>-1</sup>. DSC were determined on a METTLER TOLEDO DSC 3 at a heating rate of 10 °C·min<sup>-1</sup> in a N<sub>2</sub> atmosphere with a flow rate of 50 mL·min<sup>-1</sup> under ambient atmospheric pressure. Impact sensitivities (*IS*) and friction sensitivity (*FS*) were measured on home-made devices according to the UN Recommendations on the Transport of Dangerous Goods, Manual of Tests and Criteria.

#### 5. References.

- (1) Y. Xiao, B. Jin, R. Peng, J. Zhao, Q. Liu and S. Chu, *Journal of Molecular Structure*, 2017, **1146**, 417-423.
- (2) C. He, G. H. Imler, D. A. Parrish and J. M. Shreeve, *J. Mater. Chem. A*, 2018, **6**, 16833–16837.
- (3) Q. Wang, Y. Shao and M. Lu, *Cryst. Growth Des*, 2018, **18**, 6150–6154.
- (4) J. Evers, I. Gospodinov, M. Joas, T. M. Klapötke and J. Stierstorfer, *Inorg. Chem*, 2014, **53**, 11749–11756.
